# Supplementary material for: Impact of COVID-19 Pandemic on Children Visiting Emergency Department for Mental Illness: A Multicenter Database Analysis from Korea
Source: MDPI journal article supplement (doi:10.3390/children9081208), 2022-08-11
Supplement: s1 [file s1]

**Supplemental Table S1.** Subgroups of mental illness by ICD-10 code.

| Diagnosis                                   | ICD code                                                                                 |
|---------------------------------------------|------------------------------------------------------------------------------------------|
| Anxiety disorders                           | F40, F41, F42, F48.8–F48.9                                                               |
| Mood disorders                              | F06.3, F30–F34                                                                           |
| Somatoform disorders                        | F45                                                                                      |
| Developmental disorders                     | F64.2, F70–79, F80–89, F84, F93–F95, F98                                                 |
| Schizophrenia and other psychotic disorders | F06.0–F06.2, F20–F29                                                                     |
| Alcohol use disorder                        | F10, F55                                                                                 |
| Intentional self-harm                       | X60–X84                                                                                  |
| Medicine use disorder                       | F11–F19, T36–T50                                                                         |
| Miscellaneous                               | F02.8, F03.9, F04, F05, F07, F09, F43, F44, F48.1–F48.2, F50–F59, F60–F69, F90, F91, F99 |
